# Supplementary material for: Incidence of Long-Term Pulmonary Vein Reconnection after a 2-Minute Cryoballoon Freeze for Pulmonary Vein Isolation—Invasive Insights of TTI-Dependent Cryoenergy Titration
Source: MDPI journal article supplement (doi:10.3390/jcdd9090284), 2022-08-23
Supplement: s1 [file s1]

| <u>Procedural complications</u>  | Total<br>(n= 219) | Fixed group<br>(n= 45) | TTL group<br>(n= 174) | p-value |
|----------------------------------|-------------------|------------------------|-----------------------|---------|
| Total                            | 15 (6,8%)         | 4 (8,9%)               | 11 (6,3%)             | 0.54    |
| 1 <sup>st</sup> ablation (Cryo)  | 9 (4,1 %)         | 1 (2,2%)               | 8 (4,6%)              | 0.47    |
| Pericardial effusion/tamponade   | 2 (0,9%)          | 0                      | 2 (1,2%)              | n/a     |
| Phrenic nerve palsy              | 5 (2,3%)          | 1 (2,2%)               | 4 (2,3%)              | 0.98    |
| Vascular access complication     | 2 (0,9%)          | 0                      | 2 (1,2%)              | n/a     |
| PV stenosis                      | 0                 | 0                      | 0                     | n/a     |
| Atrioesophageal fistula          | 0                 | 0                      | 0                     | n/a     |
| Esophageal lesions               | 0                 | 0                      | 0                     | n/a     |
| Stroke/Transient ischemic attack | 0                 | 0                      | 0                     | n/a     |
| Hemodynamic instability          | 0                 | 0                      | 0                     | n/a     |
| Death                            | 0                 | 0                      | 0                     | n/a     |
| 2 <sup>nd</sup> ablation (RF)    | 6 (2,7%)          | 3 (6,7%)               | 3 (1,7%)              | 0.07    |
| Pericardial effusion/tamponade   | 4 (1,8%)          | 2 (4,4%)               | 2 (1,2%)              | 0.14    |
| Phrenic nerve palsy              | 0                 | 0                      | 0                     | n/a     |
| Vascular access complication     | 1 (0,5%)          | 0                      | 1 (0,6%)              | n/a     |
| PV stenosis                      | 0                 | 0                      | 0                     | n/a     |
| Atrioesophageal fistula          | 0                 | 0                      | 0                     | n/a     |
| Esophageal lesions               | 0                 | 0                      | 0                     | n/a     |
| Stroke/Transient ischemic attack | 0                 | 0                      | 0                     | n/a     |
| Hemodynamic instability          | 1 (0,5%)          | 1 (2,2%)               | 0                     | n/a     |
| Death                            | 0                 | 0                      | 0                     | n/a     |
